# Supplementary material for: Wearable multi-channel microelectrode membranes for elucidating electrophysiological phenotypes of injured myocardium
Source: Royal Society of Chemistry journal article supplement (doi:10.1039/c4ib00052h), 2014-05-16
Supplement: c4ib00052h1.pdf [file c4ib00052h1.pdf]

## **Wearable Multi-Channel Microelectrode Membranes to Reveal Injured Cardiac Electrical Signals of Small Vertebral Animals**

Hung Cao<sup>\*1,4,7</sup>, Yu Zhao<sup>\*2</sup>, Fei Yu<sup>1</sup>, Xiaoxiao Zhang<sup>2</sup>, Joyce Tai<sup>6</sup>, Juhyun Lee<sup>1,4,7</sup>, Ali Darehzereshki<sup>5</sup>, Malcolm Bersohn<sup>4,7</sup>, Ching-Ling Lien<sup>5</sup>, Neil C. Chi<sup>3</sup>, Yu-Chong Tai<sup>2</sup>, Tzung K. Hsiai<sup>1,4,7</sup>

*\*Two authors contributed equally*

<sup>1</sup>Department of Bioengineering, University of California, Los Angeles, CA

<sup>2</sup>Department of Electrical Engineering, California Institute of Technology, Pasadena, CA

<sup>3</sup>Division of Cardiology, Department of Medicine, School of Medicine, University of California, San Diego, La Jolla, CA

<sup>4</sup>Division of Cardiology, Department of Medicine, School of Medicine, University of California, Los Angeles, CA

<sup>5</sup>Children's Hospital Los Angeles, Los Angeles, CA

<sup>6</sup>Tufts University, Medford, MA, USA

<sup>7</sup>VA Greater Los Angeles Healthcare System

Corresponding Author:

Tzung K. Hsiai, M.D., Ph.D.

Department of Medicine (Cardiology), Bioengineering, and Physiology

David Geffen School of Medicine

Henry Samueli School of Engineering and Applied Science

University of California, Los Angeles, Los Angeles, CA 90073

Email [THsiai@mednet.ucla.edu](mailto:THsiai@mednet.ucla.edu)

Fax: (310) 268-4822

### **List of Supplemental Figures**

**Fig. S1.** Micro-fabrication of the flexible MEA membrane. (a) Step-by-step fabrication processes resulted in a 4-lead ECG. (b) Schematic diagram of the MEA membrane highlighted 4 working electrodes A, B, C and D, respectively, in the MEA head, the reference electrode and contact pads in the rear.

**Fig. S2.** Characterization of the MEA impedance. (a) The flexible MEA membrane was placed on the chest of the zebrafish. (b) Equivalent circuit model consisted of 1) the front-end planar metal electrodes in contact with contracting heart (signal source), and 2) the rear-end instrumentation amplifier associated with high input impedance. (c) Characterization set-up. (d) Impedance increased in response to a decrease in the diameter of the electrode.

**Fig. S3.** ECG of fish sham – before injury (a) and (b) at 8 weeks after injury showing ST segment failed to normalize to baseline.

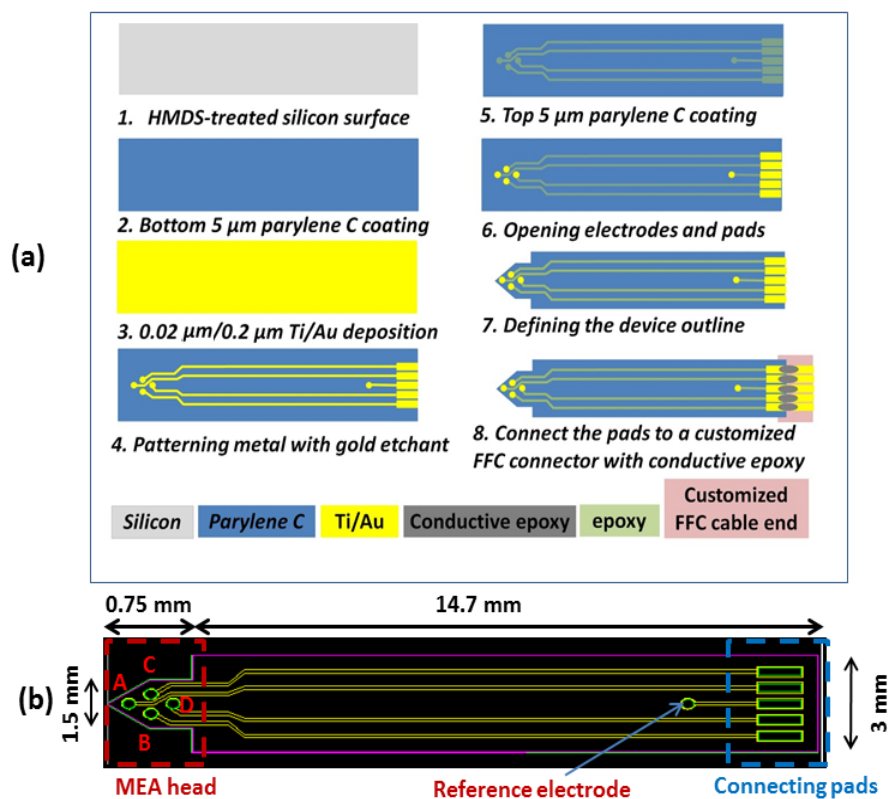

**Fig. S1.** Micro-fabrication of the flexible MEA membrane. (a) Step-by-step fabrication processes resulted in a 4-lead ECG. (b) Schematic diagram of the MEA membrane highlighted 4 working electrodes A, B, C and D, respectively, in the MEA head, the reference electrode and contact pads in the rear.

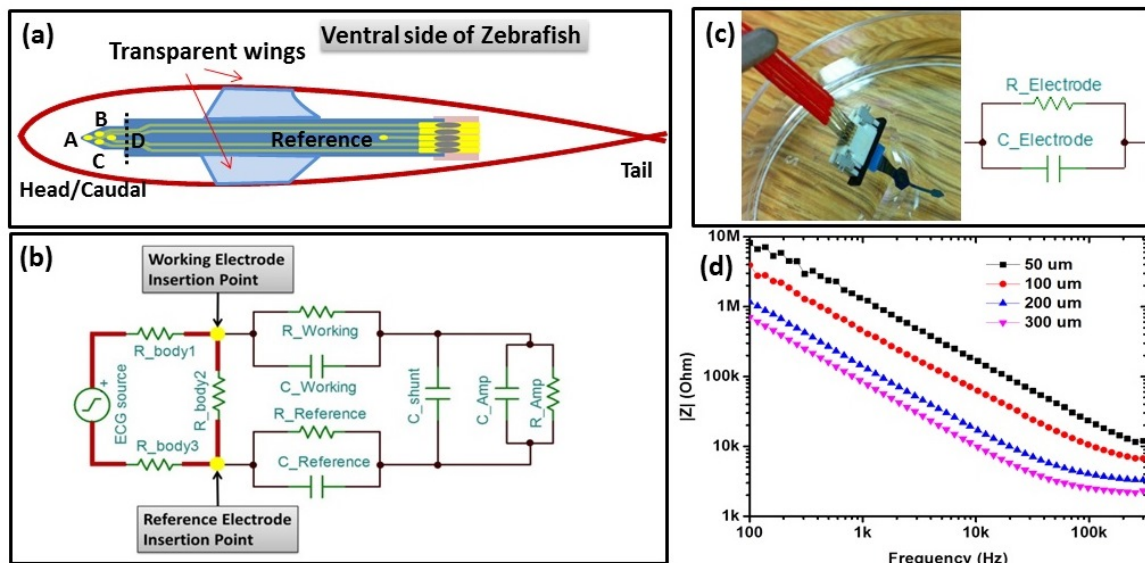

**Fig. S2.** Characterization of the MEA impedance. (a) The flexible MEA membrane was placed on the abdomen of the zebrafish. (b) Equivalent circuit model consisted of 1) the front-end planar metal electrodes in contact with contracting heart (signal source), and 2) the rear-end instrumentation amplifier associated with high input impedance. (c) Characterization setup. (d) Impedance increased in response to a decrease in the diameter of the electrode.

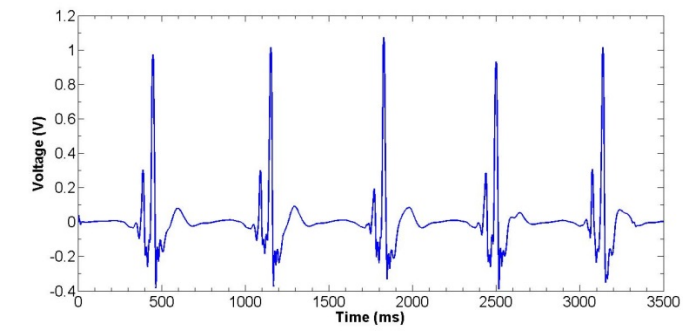

(a)

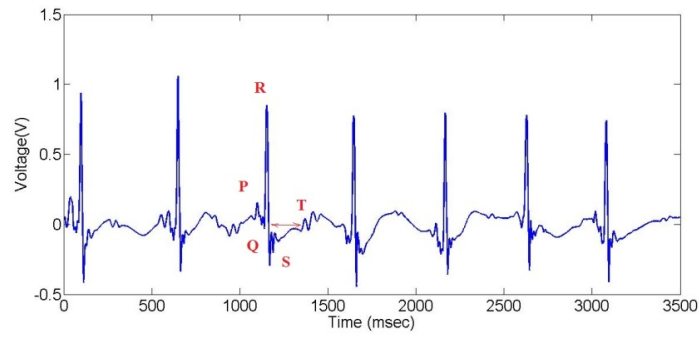

(b)

**Fig. S3.** ECG of fish sham – before injury (a) and (b) at 8 weeks after injury showing ST segment failed to normalize to baseline.
